# Supplementary material
Source: PubMed Central journal article supplement (PMC6731411)
Supplement: ajtr0011-4866-f7.pdf [file ajtr0011-4866-f7.pdf]

## Prognosis of STAT members in non-small cell lung cancer

**Supplementary Table 1.** The desired Affymetrix ID of STAT family genes in [www.kmplot.com](http://www.kmplot.com)

| Gene   | Affymetrix ID |
|--------|---------------|
| STAT1  | 200887_s_at   |
| STAT2  | 217199_s_at   |
| STAT3  | 208991_at     |
| STAT4  | 206118_at     |
| STAT5A | 203010_s_at   |
| STAT5B | 212549_at     |
| STAT6  | 201331_s_at   |

**Supplementary Table 2.** The number of datasets significantly correlated with STAT genes up-regulation and down-regulation in lung cancer tissues versus normal tissues, was displayed at  $p$ -value 0.05, fold change 1.5, gene rank: top 10%

| Gene   | Up-regulation (case number) | Down-regulation (case number) |
|--------|-----------------------------|-------------------------------|
| STAT1  | 8                           | 1                             |
| STAT2  | 0                           | 0                             |
| STAT3  | 0                           | 1                             |
| STAT4  | 0                           | 2                             |
| STAT5A | 0                           | 6                             |
| STAT5B | 0                           | 5                             |
| STAT6  | 0                           | 3                             |

**Supplementary Table 3.** Protein expression patterns of STATs in NSCLC by the Human Protein Atlas

| Gene  | Antibody  | High | Medium | Low | Not-detected | Total |
|-------|-----------|------|--------|-----|--------------|-------|
| STAT1 | CAB004049 | 1    | 3      | 1   | 7            | 11    |
| STAT2 | HPA018888 | 0    | 2      | 1   | 8            | 11    |
| STAT3 | HPA058603 | 1    | 6      | 0   | 4            | 12    |
| STAT4 | CAB013108 | 2    | 2      | 3   | 5            | 12    |
| STAT5 | HPA049883 | 2    | 1      | 0   | 7            | 10    |
| STAT6 | HPA049883 | 0    | 3      | 5   | 4            | 12    |
